# Supplementary material for: Allometry of Defense: Predator Shift Alters Ontogenetic Growth Patterns in an Antipredator Trait
Source: MDPI journal article supplement (doi:10.3390/insects14080712), 2023-08-17
Supplement: s1 [file s1]

## Supplementary materials

**Table S1.** Models used for fitting scaling relationship between spines (S) and body size (H for head width). Absolute growth rate (AGR) is the derivative of S with respect to H, i.e.  $dS/dH$ . Relative growth rate (RGR) can be expressed either as a function of body size (H), i.e.  $(dS/dH)/H$ . Inflection point is the point of body size at which AGR is maximized.

| Shape                                                                               | Name                     | Description                                                                                                                         |
|-------------------------------------------------------------------------------------|--------------------------|-------------------------------------------------------------------------------------------------------------------------------------|
|    | Linear                   | Constant AGR                                                                                                                        |
|    | Exponential              | Constant RGR                                                                                                                        |
|    | Power law                | RGR will slow down with increasing of body size                                                                                     |
|   | Monomolecular            | AGR is fast initially and slows thereafter                                                                                          |
|  | Three-parameter logistic | Asymptotic regression; lower horizontal asymptote is fixed at 0, the inflection point falls at $K/2$ (K is asymptotic spine length) |
|  | Four-parameter logistic  | Loose one or the other of strictures in three-parameter logistic model                                                              |
|  | Gompertz                 | Inflection point occurs at around 37% of asymptotic spine length K                                                                  |

Reference: Paine et al. How to fit nonlinear plant growth models and calculate growth rates: an update for ecologists. *Methods in Ecology and Evolution*, 2012, 3, 245–256.

**Table S2.** The head width on the inflexion points (HIP) of the curves and its SE for each spine in *Leucorrhinia* species.

| Species              | HIP for lateral 9 | SE for lateral 9 | HIP for lateral 8 | SE for lateral 8 | Fitting model for spine 9 | Fitting model for spine 8 |
|----------------------|-------------------|------------------|-------------------|------------------|---------------------------|---------------------------|
| <i>L. albifrons</i>  | 3.717             | 0.094            | 3.407             | 0.106            | logis                     | logis                     |
| <i>L. caudalis</i>   | 4.199             | 0.122            | 3.501             | 0.124            | logis                     | logis                     |
| <i>L. dubia</i>      | 2.902             | 0.055            | 2.970             | 0.061            | logis                     | logis                     |
| <i>L. pectoralis</i> | 3.632             | 0.070            | 3.426             | 0.088            | logis                     | 4pl                       |
| <i>L. rubicunda</i>  | 2.843             | 0.076            | 2.960             | 0.084            | logis                     | 4pl                       |
